# Supplementary material for: Novel Molecular Vehicle-Based Approach for Cardiac Cell Transplantation Leads to Rapid Electromechanical Graft–Host Coupling
Source: Int J Mol Sci. 2023 Jun 20;24(12):10406. doi: 10.3390/ijms241210406 (PMC10299342; doi:10.3390/ijms241210406)
Supplement: Supplementary file 1 [file ijms-24-10406-s001.zip]

Archive with 5 entries (5 files):
- ijms-2410118-supplementary.pdf
- Video S1.avi
- Video S2.avi
- Video S3.avi
- Video S4.avi
